# Supplementary material
Source: Springer Nature journal article supplement (https://www.springermedizin.de/resource/supplementary/12931_2013_1425_MOESM3_ESM.pdf/9425968)

**A****MUC5AC**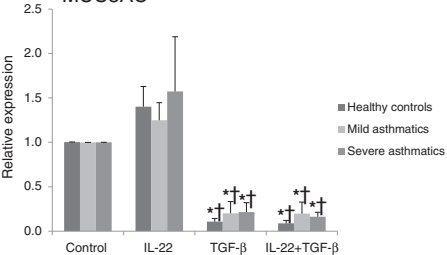**B****E-cadherin**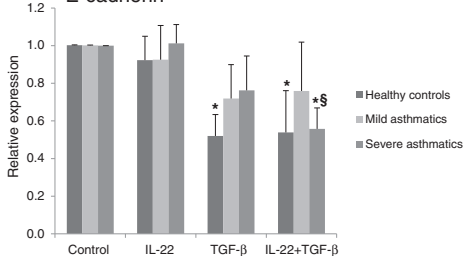

Supplement: MOESM3 [file 9425968]
